# Supplementary material for: A Carboxy-terminal Inter-Helix Linker As the Site of Phosphatidylinositol 4,5-Bisphosphate Action on Kv7 (M-type) K+ Channels
Source: PubMed Central journal article supplement — J Gen Physiol. 2008 Sep;132(3):361–81. doi: 10.1085/jgp.200810007 (PMC2518730; doi:10.1085/jgp.200810007), 2008-09
Supplement: jgp.200810007_5.pdf [file jgp.200810007_5.pdf]

Table S1. Summary of predicted hydrogen bond energies and inter-atomic distances in Kv7.2–GMPI(4,5)P<sub>2</sub> complexes I

| Kv7.2–GMPI(4,5)P <sub>2</sub> interactions |                 |                 |            |                  |                 |                 |            |
|--------------------------------------------|-----------------|-----------------|------------|------------------|-----------------|-----------------|------------|
| Hydrogen bond                              |                 | Interaction     |            | Hydrogen bond    |                 | Interaction     |            |
| Atom 1 (WT)                                | Atom 2 (ligand) | Energy (kJ/mol) | Length (Å) | Atom 1 (KRR-EEE) | Atom 2 (ligand) | Energy (kJ/mol) | Length (Å) |
| R461(N $\alpha$ )                          | InsP1           | −0.41           | 3.52       | R463(NH2)        | InsP4           | −2.27           | 2.93       |
| R461(NH1)                                  | InsP1           | −2.49           | 2.60       | R463(NH1)        | InsP4           | −0.52           | 3.50       |
| R461(NH2)                                  | InsP1           | −0.45           | 3.34       | R463(NH1)        | InsP5           | −2.5            | 2.60       |
| R463(NH2)                                  | InsP4           | −1.47           | 2.80       |                  |                 |                 |            |
| R463(NH2)                                  | InsP4           | −0.12           | 3.30       |                  |                 |                 |            |
| R463(N $\epsilon$ )                        | InsP4           | −0.64           | 2.50       |                  |                 |                 |            |
| R459(NH2)                                  | InsP5           | −2.5            | 2.60       |                  |                 |                 |            |
| S460(O $\gamma$ )                          | InsP5           | −2.5            | 2.85       |                  |                 |                 |            |
| R463(N $\epsilon$ )                        | InsP5           | −1.67           | 2.95       |                  |                 |                 |            |
| R463(NH1)                                  | InsP5           | −0.09           | 3.58       |                  |                 |                 |            |
| R463(NH1)                                  | InsP5           | −2.5            | 2.60       |                  |                 |                 |            |
| S460(O $\gamma$ )                          | InsC2           | −2.5            | 2.69       |                  |                 |                 |            |
| R461(N $\alpha$ )                          | InsC2           | −0.37           | 3.01       |                  |                 |                 |            |
| R461(O $\alpha$ )                          | InsC2           | −2.5            | 2.69       |                  |                 |                 |            |

Shown are the predicted hydrogen bonds between the indicated atom of the wild-type and KRR-EEE Kv7.2 channel and the indicated atom of GMPI(4,5)P<sub>2</sub>.

Table S2. Summary of predicted hydrogen bonds energies and inter-atomic distances in Kv7.2– GMPI-P<sub>2</sub> complexes II

| Kv7.2–GMPI(4,5)P <sub>2</sub> interactions |                    |                    |               |                       |                    |                    |               |                         |                    |                    |               |                         |                    |                    |               |
|--------------------------------------------|--------------------|--------------------|---------------|-----------------------|--------------------|--------------------|---------------|-------------------------|--------------------|--------------------|---------------|-------------------------|--------------------|--------------------|---------------|
| Hydrogen bond                              |                    | Interaction        |               | Hydrogen bond         |                    | Interaction        |               | Hydrogen bond           |                    | Interaction        |               | Hydrogen bond           |                    | Interaction        |               |
| Atom 1<br>(R463Q)                          | Atom 2<br>(ligand) | Energy<br>(kJ/mol) | Length<br>(Å) | Atom 1<br>(R463E)     | Atom 2<br>(ligand) | Energy<br>(kJ/mol) | Length<br>(Å) | Atom 1<br>(R467Q)       | Atom 2<br>(ligand) | Energy<br>(kJ/mol) | Length<br>(Å) | Atom 1<br>(R467E)       | Atom 2<br>(ligand) | Energy<br>(kJ/mol) | Length<br>(Å) |
| R459<br>(NH1)                              | InsP1              | -2.5               | 2.61          | S460<br>(O $\gamma$ ) | InsP1              | -2.5               | 2.80          | R461<br>(N $\epsilon$ ) | InsP1              | -0.31              | 3.52          | R461<br>(NH2)           | InsP4              | -1.19              | 2.54          |
| R461<br>(NH1)                              | InsP4              | -2.5               | 2.79          | R434<br>(NH1)         | InsP4              | -2.5               | 2.96          | R463<br>(NH2)           | InsP4              | -1.30              | 3.02          | R461<br>(NH1)           | InsP4              | -2.03              | 2.54          |
| R461<br>(N $\epsilon$ )                    | InsP5              | -0.90              | 2.80          | R435<br>(NH2)         | InsP4              | -1.38              | 2.84          | R463<br>(NH1)           | InsP4              | -2.5               | 2.62          | R463<br>(NH2)           | InsP4              | -0.64              | 2.38          |
| R461<br>(NH1)                              | InsP5              | -2.5               | 3.08          | R461<br>(NH2)         | InsP4              | -1.61              | 2.77          | R461<br>(NH2)           | InsP5              | -2.01              | 3.18          | R463<br>(NH2)           | InsP4              | -1.04              | 3.23          |
| R461<br>(NH1)                              | InsP5              | -0.61              | 2.81          | R461<br>(NH1)         | InsP4              | -2.49              | 2.60          | R463<br>(NH1)           | InsP5              | -2.5               | 2.70          | R434<br>(NH2)           | InsP5              | -0.04              | 2.82          |
|                                            |                    |                    |               | R434<br>(NH1)         | InsP5              | -1.73              | 3.25          | R463<br>(NH1)           | InsP5              | -0.84              | 3.02          | R434<br>(NH2)           | InsP5              | -0.47              | 3.33          |
|                                            |                    |                    |               | R434<br>(NH2)         | InsP5              | -1.33              | 2.94          | R463<br>(NH2)           | InsP5              | -0.38              | 3.35          | R435<br>(N $\alpha$ )   | InsP5              | -2.5               | 2.81          |
|                                            |                    |                    |               | V433<br>(O $\alpha$ ) | InsC2              | -2.5               | 2.70          | S460<br>(O $\gamma$ )   | InsC3              | -1.70              | 2.50          | R463<br>(N $\epsilon$ ) | InsP5              | -1.66              | 3.23          |
|                                            |                    |                    |               | S460<br>(O $\gamma$ ) | InsC2              | -2.5               | 2.70          |                         |                    |                    |               | V433<br>(O $\alpha$ )   | InsC2              | -1.72              | 3.26          |
|                                            |                    |                    |               | R435<br>(N $\alpha$ ) | InsC3              | -0.41              | 3.36          |                         |                    |                    |               | S460<br>(O $\gamma$ )   | InsC3              | -2.5               | 2.76          |
|                                            |                    |                    |               | R461<br>(N $\alpha$ ) | InsC3              | -2.23              | 3.15          |                         |                    |                    |               | R461<br>(N $\alpha$ )   | InsC3              | -1.33              | 3.29          |
|                                            |                    |                    |               |                       |                    |                    |               |                         |                    |                    |               | R461<br>(O $\alpha$ )   | InsC3              | -2.13              | 2.56          |
|                                            |                    |                    |               |                       |                    |                    |               |                         |                    |                    |               | R461<br>(NH1)           | InsC3              | -2.5               | 3.06          |
|                                            |                    |                    |               |                       |                    |                    |               |                         |                    |                    |               | R434<br>(NH2)           | InsC6              | -2.5               | 2.62          |

Shown are the predicted hydrogen bonds between the indicated atom of the R463Q, R463E, R467Q, or R467E Kv7.2 channel and the indicated atom of GMPI(4,5)P<sub>2</sub>.

Table S3. Summary of predicted hydrogen bond energies and inter-atomic distances in Kv7.3–GMPI(4,5)P<sub>2</sub> complexes

| Kv7.3–GMPI(4,5)P <sub>2</sub> interactions |                 |                 |            |                  |                 |                 |            |
|--------------------------------------------|-----------------|-----------------|------------|------------------|-----------------|-----------------|------------|
| Hydrogen bond                              |                 | Interaction     |            | Hydrogen bond    |                 | Interaction     |            |
| Atom 1 (WT)                                | Atom 2 (ligand) | Energy (kJ/mol) | Length (Å) | Atom 1 (KKR-EEE) | Atom 2 (ligand) | Energy (kJ/mol) | Length (Å) |
| R434(NH2)                                  | InsP1           | −1.25           | 2.58       | R436(NH1)        | InsP5           | −2.50           | 2.76       |
| R434(NH2)                                  | InsP5           | −1.29           | 3.00       | R436(NH2)        | InsP5           | −2.50           | 2.73       |
| R434(NH1)                                  | InsP5           | −2.50           | 3.10       | R436(NH2)        | InsP4           | −1.29           | 2.60       |
| K432(Nε)                                   | InsP5           | −0.86           | 3.43       | T437(Oα)         | InsC3           | −1.61           | 2.49       |
| K406(Nε)                                   | InsP5           | −2.45           | 2.59       | T437(Nα)         | InsC3           | −0.70           | 2.60       |
| R436(NH1)                                  | InsP5           | −1.17           | 2.44       | T437(Oγ)         | InsC3           | −2.50           | 3.02       |
| K406(Nε)                                   | InsP4           | −2.49           | 2.60       | R436(NH1)        | InsC2           | −1.05           | 3.39       |
| R436(NH1)                                  | InsP4           | −2.33           | 3.13       |                  |                 |                 |            |
| R436(NH1)                                  | InsC2           | −2.50           | 2.83       |                  |                 |                 |            |
| R436(NH2)                                  | InsC2           | −1.86           | 2.77       |                  |                 |                 |            |

Shown are the predicted hydrogen bonds between the indicated atom of the wild-type or KKR-EEE Kv7.3 channel and the indicated atom of GMPI(4,5)P<sub>2</sub>.
